# Supplementary material for: Association between maternal body composition during pregnancy and birth weight of offspring in pregnant women with gestational diabetes mellitus
Source: Research Square preprint supplement (doi:10.21203/rs.3.rs-7019486/v1), 2025-07-15
Supplement: Supplementary file 1 [file c1e768dafd7cb865ee8867d1.docx]

**Supplement**

[**eTable 1.** Recommended weight gain standards during pregnancy in China 2](#_Toc198478572)

[**eTable 2**. Subgroup analyses of the association between TBW and birth weight 3](#_Toc198478573)

[**eTable 3**. Subgroup analyses of the association between PTBW and birth weight 4](#_Toc198478574)

[**eTable 4**. Subgroup analyses of the association between ICF and birth weight 5](#_Toc198478575)

[**eTable 5**. Subgroup analyses of the association between PICF and birth weight 6](#_Toc198478576)

[**eTable 6**. Subgroup analyses of the association between ECF and birth weight 7](#_Toc198478577)

[**eTable 7**. Subgroup analyses of the association between PECF and birth weight 8](#_Toc198478578)

[**eTable 8**.Subgroup analyses of the association between FM and birth weight 9](#_Toc198478579)

[**eTable 9**.Subgroup analyses of the association between PBF and birth weight 10](#_Toc198478580)

[**eTable 10**. Subgroup analyses of the association between FMM and birth weight 11](#_Toc198478581)

[**eTable 11**. Subgroup analyses of the association between PFFM and birth weight 12](#_Toc198478582)

[**eTable 12**. Subgroup analyses of the association between MM and birth weight 13](#_Toc198478583)

[**eTable 13**.Subgroup analyses of the association between PMM and birth weight 14](#_Toc198478584)

[**eTable 14**. Subgroup analyses of the association between protein and birth weight 15](#_Toc198478585)

[**eTable 15**. Subgroup analyses of the association between percent protein and birth weight 16](#_Toc198478586)

[**eTable 16**. Subgroup analyses of the association between minerals and birth weight 17](#_Toc198478587)

[**eTable 17**.Subgroup analyses of the association between percent minerals and birth weight 18](#_Toc198478588)

[**eFigure.** Dose-Response Association of Maternal Body Composition with Offspring Birth Weight. 19](#_Toc198478589)

**eTable 1.** Recommended weight gain standards during pregnancy in China

| Pre-pregnancy Body Mass Index (BMI) Categories | Total Gestational Weight Gain Range(kg) |
| --- | --- |
| Underweight (BMI＜18.5 kg/m2 ) | 11.0 ~ 16.0 |
| Normal (18.5 kg/m2 ≤ BMI＜24.0 kg/m2) | 8.0 ~ 14.0 |
| Overweight (24.0 kg/m2 ≤ BMI＜28.0 kg/m2) | 7.0 ~ 11.0 |
| Overweight (BMI ≥ 28.0 kg/m2) | 5.0 ~ 9.0 |

Gestational weight gain is classified as insufficient, appropriate, or excessive based on its relationship to pre-pregnancy BMI-specific total weight gain ranges: values below the range are defined as insufficient weight gain, those within the range as appropriate weight gain, and values exceeding the range as excessive weight gain.

**eTable 2**. Subgroup analyses of the association between TBW and birth weight

| Variables | n (%) | β (95%CI) | P | P for interaction |
| --- | --- | --- | --- | --- |
| All patients | 929 (100.00) | 35.58 (26.81 ~ 44.36) | <.001 |  |
| Gravidity |  |  |  | 0.274 |
| 1 | 323 (34.77) | 40.01 (24.68 ~ 55.35) | <.001 |  |
| 2 | 302 (32.51) | 33.31 (17.11 ~ 49.51) | <.001 |  |
| ≥3 | 304 (32.72) | 36.27 (22.13 ~ 50.41) | <.001 |  |
| Parity |  |  |  | 0.426 |
| 0 | 453 (48.76) | 38.16 (24.76 ~ 51.56) | <.001 |  |
| 1 | 365 (39.29) | 36.14 (22.40 ~ 49.88) | <.001 |  |
| ≥2 | 111 (11.95) | 34.33 (13.02 ~ 55.64) | 0.002 |  |
| BMI Category |  |  |  | 0.072 |
| Normal | 602 (64.80) | 34.09 (23.24 ~ 44.94) | <.001 |  |
| Underweight | 73 (7.86) | -21.15 (-53.75 ~ 11.45) | 0.208 |  |
| Overweight and Obese | 254 (27.34) | 34.64 (19.56 ~ 49.72) | <.001 |  |
| GWG |  |  |  | 0.654 |
| Appropriate weight gain | 482 (51.88) | 41.03 (28.88 ~ 53.18) | <.001 |  |
| Insufficient weight gain | 157 (16.90) | 27.10 (4.03 ~ 50.18) | 0.023 |  |
| Excessive weight gain | 290 (31.22) | 31.32 (15.65 ~ 46.98) | <.001 |  |
| Pregnancy Period |  |  |  | 0.743 |
| Second trimester (14-28 weeks) | 676 (72.77) | 33.61 (23.07 ~ 44.15) | <.001 |  |
| Third trimester (≥28 weeks) | 253 (27.23) | 42.53 (26.31 ~ 58.75) | <.001 |  |
| CI: Confidence Interval | | | | |

**eTable 3**. Subgroup analyses of the association between PTBW and birth weight

| Variables | n (%) | β (95%CI) | P | P for interaction |
| --- | --- | --- | --- | --- |
| All patients | 929 (100.00) | 5.10 (-4.61 ~ 14.82) | 0.304 |  |
| Gravidity |  |  |  | 0.442 |
| 1 | 323 (34.77) | -6.16 (-24.26 ~ 11.94) | 0.505 |  |
| 2 | 302 (32.51) | 16.41 (0.37 ~ 32.45) | 0.046 |  |
| ≥3 | 304 (32.72) | 3.14 (-13.09 ~ 19.38) | 0.705 |  |
| Parity |  |  |  | 0.771 |
| 0 | 453 (48.76) | 0.80 (-14.33 ~ 15.92) | 0.918 |  |
| 1 | 365 (39.29) | 9.44 (-5.14 ~ 24.02) | 0.205 |  |
| ≥2 | 111 (11.95) | 3.38 (-20.89 ~ 27.65) | 0.786 |  |
| BMI Category |  |  |  | 0.292 |
| Normal | 602 (64.80) | 5.13 (-5.70 ~ 15.97) | 0.353 |  |
| Underweight | 73 (7.86) | -20.01 (-41.97 ~ 1.95) | 0.079 |  |
| Overweight and Obese | 254 (27.34) | 3.47 (-11.81 ~ 18.74) | 0.657 |  |
| GWG |  |  |  | 0.498 |
| Appropriate weight gain | 482 (51.88) | 7.22 (-6.15 ~ 20.59) | 0.290 |  |
| Insufficient weight gain | 157 (16.90) | 11.08 (-11.73 ~ 33.89) | 0.343 |  |
| Excessive weight gain | 290 (31.22) | -8.98 (-26.72 ~ 8.76) | 0.322 |  |
| Pregnancy Period |  |  |  | 0.667 |
| Second trimester (14-28 weeks) | 676 (72.77) | 4.04 (-7.83 ~ 15.91) | 0.505 |  |
| Third trimester (≥28 weeks) | 253 (27.23) | 6.83 (-10.47 ~ 24.13) | 0.440 |  |
| CI: Confidence Interval | | | | |

**eTable 4**. Subgroup analyses of the association between ICF and birth weight

| Variables | n (%) | β (95%CI) | *P* | P for interaction |
| --- | --- | --- | --- | --- |
| All patients | 929 (100.00) | 54.81 (40.52 ~ 69.10) | <.001 |  |
| Gravidity |  |  |  | 0.279 |
| 1 | 323 (34.77) | 61.46 (36.23 ~ 86.70) | <.001 |  |
| 2 | 302 (32.51) | 49.74 (23.40 ~ 76.09) | <.001 |  |
| ≥3 | 304 (32.72) | 56.84 (33.97 ~ 79.70) | <.001 |  |
| Parity |  |  |  | 0.374 |
| 0 | 453 (48.76) | 56.95 (34.95 ~ 78.94) | <.001 |  |
| 1 | 365 (39.29) | 56.46 (34.25 ~ 78.66) | <.001 |  |
| ≥2 | 111 (11.95) | 55.75 (21.37 ~ 90.13) | 0.002 |  |
| BMI Category |  |  |  | 0.058 |
| Normal | 602 (64.80) | 52.62 (35.12 ~ 70.12) | <.001 |  |
| Underweight | 73 (7.86) | -36.52 (-87.51 ~ 14.48) | 0.165 |  |
| Overweight and Obese | 254 (27.34) | 54.12 (29.42 ~ 78.82) | <.001 |  |
| GWG |  |  |  | 0.657 |
| Appropriate weight gain | 482 (51.88) | 64.00 (44.22 ~ 83.77) | <.001 |  |
| Insufficient weight gain | 157 (16.90) | 39.62 (2.42 ~ 76.82) | 0.039 |  |
| Excessive weight gain | 290 (31.22) | 47.70 (22.06 ~ 73.34) | <.001 |  |
| Pregnancy Period |  |  |  | 0.752 |
| Second trimester (14-28 weeks) | 676 (72.77) | 51.81 (34.63 ~ 68.99) | <.001 |  |
| Third trimester (≥28 weeks) | 253 (27.23) | 65.61 (39.21 ~ 92.00) | <.001 |  |
| CI: Confidence Interval | | | | |

**eTable 5**. Subgroup analyses of the association between PICF and birth weight

| Variables | n (%) | β (95%CI) | P | P for interaction |
| --- | --- | --- | --- | --- |
| All patients | 929 (100.00) | 3.13 (-12.08 ~ 18.34) | 0.687 |  |
| Gravidity |  |  |  | 0.525 |
| 1 | 323 (34.77) | -16.14 (-44.16 ~ 11.87) | 0.260 |  |
| 2 | 302 (32.51) | 19.46 (-5.81 ~ 44.72) | 0.132 |  |
| ≥3 | 304 (32.72) | 2.27 (-23.24 ~ 27.78) | 0.861 |  |
| Parity |  |  |  | 0.915 |
| 0 | 453 (48.76) | -7.42 (-30.93 ~ 16.09) | 0.536 |  |
| 1 | 365 (39.29) | 11.93 (-10.86 ~ 34.72) | 0.305 |  |
| ≥2 | 111 (11.95) | 6.46 (-32.41 ~ 45.33) | 0.745 |  |
| BMI Category |  |  |  | 0.259 |
| Normal | 602 (64.80) | 5.77 (-11.62 ~ 23.16) | 0.516 |  |
| Underweight | 73 (7.86) | -33.19 (-66.63 ~ 0.25) | 0.056 |  |
| Overweight and Obese | 254 (27.34) | 2.13 (-22.06 ~ 26.32) | 0.863 |  |
| GWG |  |  |  | 0.453 |
| Appropriate weight gain | 482 (51.88) | 6.97 (-13.75 ~ 27.69) | 0.510 |  |
| Insufficient weight gain | 157 (16.90) | 11.55 (-24.57 ~ 47.67) | 0.532 |  |
| Excessive weight gain | 290 (31.22) | -19.50 (-47.63 ~ 8.62) | 0.175 |  |
| Pregnancy Period |  |  |  | 0.637 |
| Second trimester (14-28 weeks) | 676 (72.77) | 1.33 (-17.11 ~ 19.76) | 0.888 |  |
| Third trimester (≥28 weeks) | 253 (27.23) | 6.30 (-21.24 ~ 33.84) | 0.654 |  |
| CI: Confidence Interval | | | | |

**eTable 6**. Subgroup analyses of the association between ECF and birth weight

| Variables | n (%) | β (95%CI) | P | P for interaction |
| --- | --- | --- | --- | --- |
| All patients | 929 (100.00) | 94.13 (72.06 ~ 116.19) | <.001 |  |
| Gravidity |  |  |  | 0.204 |
| 1 | 323 (34.77) | 102.26 (64.90 ~ 139.62) | <.001 |  |
| 2 | 302 (32.51) | 93.61 (52.52 ~ 134.71) | <.001 |  |
| ≥3 | 304 (32.72) | 95.90 (59.51 ~ 132.28) | <.001 |  |
| Parity |  |  |  | 0.432 |
| 0 | 453 (48.76) | 102.32 (69.47 ~ 135.18) | <.001 |  |
| 1 | 365 (39.29) | 96.05 (60.64 ~ 131.45) | <.001 |  |
| ≥2 | 111 (11.95) | 86.05 (30.92 ~ 141.18) | 0.003 |  |
| BMI Category |  |  |  | 0.106 |
| Normal | 602 (64.80) | 92.63 (64.57 ~ 120.68) | <.001 |  |
| Underweight | 73 (7.86) | -42.52 (-127.45 ~ 42.41) | 0.330 |  |
| Overweight and Obese | 254 (27.34) | 87.69 (50.50 ~ 124.88) | <.001 |  |
| GWG |  |  |  | 0.681 |
| Appropriate weight gain | 482 (51.88) | 104.08 (73.80 ~ 134.35) | <.001 |  |
| Insufficient weight gain | 157 (16.90) | 79.15 (19.53 ~ 138.77) | 0.010 |  |
| Excessive weight gain | 290 (31.22) | 86.32 (46.78 ~ 125.86) | <.001 |  |
| Pregnancy Period |  |  |  | 0.666 |
| Second trimester (14-28 weeks) | 676 (72.77) | 88.05 (61.70 ~ 114.41) | <.001 |  |
| Third trimester (≥28 weeks) | 253 (27.23) | 114.60 (73.37 ~ 155.83) | <.001 |  |
| CI: Confidence Interval | | | | |

**eTable 7**. Subgroup analyses of the association between PECF and birth weight

| Variables | n (%) | β (95%CI) | P | P for interaction |
| --- | --- | --- | --- | --- |
| All patients | 929 (100.00) | 24.99 (0.22 ~ 49.76) | 0.048 |  |
| Gravidity |  |  |  | 0.368 |
| 1 | 323 (34.77) | 3.65 (-41.19 ~ 48.49) | 0.873 |  |
| 2 | 302 (32.51) | 57.73 (16.30 ~ 99.17) | 0.007 |  |
| ≥3 | 304 (32.72) | 14.55 (-27.39 ~ 56.49) | 0.497 |  |
| Parity |  |  |  | 0.529 |
| 0 | 453 (48.76) | 24.32 (-13.41 ~ 62.05) | 0.207 |  |
| 1 | 365 (39.29) | 31.27 (-6.95 ~ 69.49) | 0.110 |  |
| ≥2 | 111 (11.95) | 5.46 (-56.05 ~ 66.96) | 0.862 |  |
| BMI Category |  |  |  | 0.428 |
| Normal | 602 (64.80) | 18.55 (-8.88 ~ 45.97) | 0.186 |  |
| Underweight | 73 (7.86) | -39.60 (-97.44 ~ 18.24) | 0.184 |  |
| Overweight and Obese | 254 (27.34) | 17.02 (-21.58 ~ 55.63) | 0.388 |  |
| GWG |  |  |  | 0.604 |
| Appropriate weight gain | 482 (51.88) | 27.77 (-6.06 ~ 61.59) | 0.108 |  |
| Insufficient weight gain | 157 (16.90) | 43.24 (-15.69 ~ 102.17) | 0.153 |  |
| Excessive weight gain | 290 (31.22) | -7.93 (-53.53 ~ 37.66) | 0.733 |  |
| Pregnancy Period |  |  |  | 0.712 |
| Second trimester (14-28 weeks) | 676 (72.77) | 22.81 (-7.43 ~ 53.04) | 0.140 |  |
| Third trimester (≥28 weeks) | 253 (27.23) | 28.29 (-15.77 ~ 72.35) | 0.210 |  |
| CI: Confidence Interval | | | | |

**eTable 8**.Subgroup analyses of the association between FM and birth weight

| Variables | n (%) | β (95%CI) | P | P for interaction |
| --- | --- | --- | --- | --- |
| All patients | 929 (100.00) | 15.72 (7.76 ~ 23.67) | <.001 |  |
| Gravidity |  |  |  | 0.112 |
| 1 | 323 (34.77) | 26.61 (12.02 ~ 41.19) | <.001 |  |
| 2 | 302 (32.51) | 4.81 (-8.59 ~ 18.21) | 0.482 |  |
| ≥3 | 304 (32.72) | 19.13 (5.93 ~ 32.34) | 0.005 |  |
| Parity |  |  |  | 0.325 |
| 0 | 453 (48.76) | 18.01 (5.88 ~ 30.14) | 0.004 |  |
| 1 | 365 (39.29) | 15.48 (3.06 ~ 27.91) | 0.015 |  |
| ≥2 | 111 (11.95) | 14.08 (-4.82 ~ 32.99) | 0.147 |  |
| BMI Category |  |  |  | 0.836 |
| Normal | 602 (64.80) | 8.79 (0.22 ~ 17.36) | 0.045 |  |
| Underweight | 73 (7.86) | 16.15 (-7.89 ~ 40.19) | 0.193 |  |
| Overweight and Obese | 254 (27.34) | 8.69 (0.15 ~ 17.22) | 0.047 |  |
| GWG |  |  |  | 0.285 |
| Appropriate weight gain | 482 (51.88) | 15.40 (4.03 ~ 26.77) | 0.008 |  |
| Insufficient weight gain | 157 (16.90) | 16.86 (-3.09 ~ 36.81) | 0.100 |  |
| Excessive weight gain | 290 (31.22) | 19.04 (6.43 ~ 31.65) | 0.003 |  |
| Pregnancy Period |  |  |  | 0.904 |
| Second trimester (14-28 weeks) | 676 (72.77) | 14.51 (4.52 ~ 24.50) | 0.005 |  |
| Third trimester (≥28 weeks) | 253 (27.23) | 19.13 (5.74 ~ 32.52) | 0.006 |  |
| CI: Confidence Interval | | | | |

**eTable 9**.Subgroup analyses of the association between PBF and birth weight

| Variables | n (%) | β (95%CI) | P | P for interaction |
| --- | --- | --- | --- | --- |
| All patients | 929 (100.00) | -2.57 (-9.78 ~ 4.64) | 0.485 |  |
| Gravidity |  |  |  | 0.424 |
| 1 | 323 (34.77) | 5.66 (-7.55 ~ 18.88) | 0.402 |  |
| 2 | 302 (32.51) | -8.67 (-20.82 ~ 3.48) | 0.163 |  |
| ≥3 | 304 (32.72) | -2.72 (-14.75 ~ 9.31) | 0.658 |  |
| Parity |  |  |  | 0.690 |
| 0 | 453 (48.76) | 0.26 (-10.85 ~ 11.36) | 0.964 |  |
| 1 | 365 (39.29) | -4.48 (-15.46 ~ 6.50) | 0.425 |  |
| ≥2 | 111 (11.95) | -2.93 (-20.89 ~ 15.03) | 0.750 |  |
| BMI Category |  |  |  | 0.320 |
| Normal | 602 (64.80) | -3.89 (-11.89 ~ 4.10) | 0.341 |  |
| Underweight | 73 (7.86) | 15.14 (-1.42 ~ 31.71) | 0.078 |  |
| Overweight and Obese | 254 (27.34) | -0.34 (-11.70 ~ 11.03) | 0.954 |  |
| GWG |  |  |  | 0.376 |
| Appropriate weight gain | 482 (51.88) | -4.91 (-14.73 ~ 4.90) | 0.327 |  |
| Insufficient weight gain | 157 (16.90) | -1.66 (-19.29 ~ 15.98) | 0.854 |  |
| Excessive weight gain | 290 (31.22) | 6.29 (-6.81 ~ 19.40) | 0.348 |  |
| Pregnancy Period |  |  |  | 0.872 |
| Second trimester (14-28 weeks) | 676 (72.77) | -2.84 (-11.58 ~ 5.90) | 0.524 |  |
| Third trimester (≥28 weeks) | 253 (27.23) | -1.74 (-14.81 ~ 11.34) | 0.795 |  |
| CI: Confidence Interval | | | | |

**eTable 10**. Subgroup analyses of the association between FMM and birth weight

| Variables | n (%) | β (95%CI) | P | P for interaction |
| --- | --- | --- | --- | --- |
| All patients | 929 (100.00) | 25.98 (19.54 ~ 32.42) | <.001 |  |
| Gravidity |  |  |  | 0.300 |
| 1 | 323 (34.77) | 28.83 (17.51 ~ 40.15) | <.001 |  |
| 2 | 302 (32.51) | 23.93 (12.05 ~ 35.81) | <.001 |  |
| ≥3 | 304 (32.72) | 26.64 (16.29 ~ 36.98) | <.001 |  |
| Parity |  |  |  | 0.450 |
| 0 | 453 (48.76) | 27.60 (17.73 ~ 37.48) | <.001 |  |
| 1 | 365 (39.29) | 26.29 (16.24 ~ 36.35) | <.001 |  |
| ≥2 | 111 (11.95) | 25.42 (9.80 ~ 41.04) | 0.002 |  |
| BMI Category |  |  |  | 0.076 |
| Normal | 602 (64.80) | 24.96 (17.02 ~ 32.90) | <.001 |  |
| Underweight | 73 (7.86) | -14.84 (-38.54 ~ 8.86) | 0.224 |  |
| Overweight and Obese | 254 (27.34) | 25.35 (14.22 ~ 36.48) | <.001 |  |
| GWG |  |  |  | 0.674 |
| Appropriate weight gain | 482 (51.88) | 29.89 (20.95 ~ 38.83) | <.001 |  |
| Insufficient weight gain | 157 (16.90) | 19.64 (2.68 ~ 36.59) | 0.025 |  |
| Excessive weight gain | 290 (31.22) | 23.07 (11.61 ~ 34.53) | <.001 |  |
| Pregnancy Period |  |  |  | 0.746 |
| Second trimester (14-28 weeks) | 676 (72.77) | 24.61 (16.87 ~ 32.36) | <.001 |  |
| Third trimester (≥28 weeks) | 253 (27.23) | 30.98 (19.09 ~ 42.87) | <.001 |  |
| CI: Confidence Interval | | | | |

**eTable 11**. Subgroup analyses of the association between PFFM and birth weight

| Variables | n (%) | β (95%CI) | P | P for interaction |
| --- | --- | --- | --- | --- |
| All patients | 929 (100.00) | 3.61 (-3.55 ~ 10.77) | 0.323 |  |
| Gravidity |  |  |  | 0.459 |
| 1 | 323 (34.77) | -5.65 (-18.87 ~ 7.57) | 0.403 |  |
| 2 | 302 (32.51) | 11.56 (-0.30 ~ 23.43) | 0.057 |  |
| ≥3 | 304 (32.72) | 2.71 (-9.32 ~ 14.73) | 0.659 |  |
| Parity |  |  |  | 0.789 |
| 0 | 453 (48.76) | -0.25 (-11.36 ~ 10.86) | 0.965 |  |
| 1 | 365 (39.29) | 6.98 (-3.78 ~ 17.75) | 0.204 |  |
| ≥2 | 111 (11.95) | 2.89 (-15.06 ~ 20.85) | 0.753 |  |
| BMI Category |  |  |  | 0.302 |
| Normal | 602 (64.80) | 3.90 (-4.10 ~ 11.89) | 0.340 |  |
| Underweight | 73 (7.86) | -15.14 (-31.71 ~ 1.42) | 0.078 |  |
| Overweight and Obese | 254 (27.34) | 2.12 (-8.95 ~ 13.19) | 0.708 |  |
| GWG |  |  |  | 0.525 |
| Appropriate weight gain | 482 (51.88) | 4.93 (-4.89 ~ 14.75) | 0.326 |  |
| Insufficient weight gain | 157 (16.90) | 7.75 (-9.10 ~ 24.59) | 0.369 |  |
| Excessive weight gain | 290 (31.22) | -6.29 (-19.39 ~ 6.81) | 0.348 |  |
| Pregnancy Period |  |  |  | 0.658 |
| Second trimester (14-28 weeks) | 676 (72.77) | 2.85 (-5.88 ~ 11.59) | 0.522 |  |
| Third trimester (≥28 weeks) | 253 (27.23) | 4.83 (-7.96 ~ 17.62) | 0.460 |  |
| CI: Confidence Interval | | | | |

**eTable 12**. Subgroup analyses of the association between MM and birth weight

| Variables | n (%) | β (95%CI) | P | P for interaction |
| --- | --- | --- | --- | --- |
| All patients | 929 (100.00) | 27.52 (20.66 ~ 34.37) | <.001 |  |
| Gravidity |  |  |  | 0.279 |
| 1 | 323 (34.77) | 30.98 (18.97 ~ 43.00) | <.001 |  |
| 2 | 302 (32.51) | 25.59 (12.94 ~ 38.23) | <.001 |  |
| ≥3 | 304 (32.72) | 28.11 (17.09 ~ 39.13) | <.001 |  |
| Parity |  |  |  | 0.419 |
| 0 | 453 (48.76) | 29.37 (18.88 ~ 39.86) | <.001 |  |
| 1 | 365 (39.29) | 28.00 (17.29 ~ 38.71) | <.001 |  |
| ≥2 | 111 (11.95) | 26.79 (10.19 ~ 43.39) | 0.002 |  |
| BMI Category |  |  |  | 0.069 |
| Normal | 602 (64.80) | 26.34 (17.89 ~ 34.80) | <.001 |  |
| Underweight | 73 (7.86) | -16.81 (-42.08 ~ 8.46) | 0.197 |  |
| Overweight and Obese | 254 (27.34) | 26.91 (15.11 ~ 38.71) | <.001 |  |
| GWG |  |  |  | 0.652 |
| Appropriate weight gain | 482 (51.88) | 31.85 (22.35 ~ 41.34) | <.001 |  |
| Insufficient weight gain | 157 (16.90) | 20.71 (2.73 ~ 38.69) | 0.025 |  |
| Excessive weight gain | 290 (31.22) | 24.14 (11.90 ~ 36.38) | <.001 |  |
| Pregnancy Period |  |  |  | 0.747 |
| Second trimester (14-28 weeks) | 676 (72.77) | 26.01 (17.77 ~ 34.24) | <.001 |  |
| Third trimester (≥28 weeks) | 253 (27.23) | 32.88 (20.21 ~ 45.54) | <.001 |  |
| CI: Confidence Interval | | | | |

**eTable 13**.Subgroup analyses of the association between PMM and birth weight

| Variables | n (%) | β (95%CI) | P | P for interaction |
| --- | --- | --- | --- | --- |
| All patients | 929 (100.00) | 3.45 (-4.09 ~ 11.00) | 0.370 |  |
| Gravidity |  |  |  | 0.456 |
| 1 | 323 (34.77) | -5.53 (-19.57 ~ 8.51) | 0.441 |  |
| 2 | 302 (32.51) | 12.09 (-0.36 ~ 24.55) | 0.058 |  |
| ≥3 | 304 (32.72) | 2.15 (-10.45 ~ 14.75) | 0.738 |  |
| Parity |  |  |  | 0.805 |
| 0 | 453 (48.76) | -0.33 (-12.06 ~ 11.41) | 0.956 |  |
| 1 | 365 (39.29) | 7.03 (-4.27 ~ 18.34) | 0.223 |  |
| ≥2 | 111 (11.95) | 2.73 (-16.17 ~ 21.63) | 0.778 |  |
| BMI Category |  |  |  | 0.281 |
| Normal | 602 (64.80) | 3.76 (-4.69 ~ 12.20) | 0.384 |  |
| Underweight | 73 (7.86) | -15.81 (-32.76 ~ 1.13) | 0.072 |  |
| Overweight and Obese | 254 (27.34) | 2.36 (-9.52 ~ 14.24) | 0.697 |  |
| GWG |  |  |  | 0.488 |
| Appropriate weight gain | 482 (51.88) | 5.17 (-5.20 ~ 15.53) | 0.329 |  |
| Insufficient weight gain | 157 (16.90) | 7.97 (-9.75 ~ 25.69) | 0.380 |  |
| Excessive weight gain | 290 (31.22) | -7.55 (-21.34 ~ 6.24) | 0.284 |  |
| Pregnancy Period |  |  |  | 0.660 |
| Second trimester (14-28 weeks) | 676 (72.77) | 2.61 (-6.59 ~ 11.81) | 0.579 |  |
| Third trimester (≥28 weeks) | 253 (27.23) | 4.84 (-8.62 ~ 18.31) | 0.481 |  |
| CI: Confidence Interval | | | | |

**eTable 14**. Subgroup analyses of the association between protein and birth weight

| Variables | n (%) | β (95%CI) | P | P for interaction |
| --- | --- | --- | --- | --- |
| All patients | 929 (100.00) | 126.81 (93.75 ~ 159.87) | <.001 |  |
| Gravidity |  |  |  | 0.279 |
| 1 | 323 (34.77) | 142.17 (83.80 ~ 200.54) | <.001 |  |
| 2 | 302 (32.51) | 115.23 (54.28 ~ 176.18) | <.001 |  |
| ≥3 | 304 (32.72) | 131.46 (78.55 ~ 184.36) | <.001 |  |
| Parity |  |  |  | 0.372 |
| 0 | 453 (48.76) | 131.70 (80.81 ~ 182.59) | <.001 |  |
| 1 | 365 (39.29) | 130.71 (79.35 ~ 182.08) | <.001 |  |
| ≥2 | 111 (11.95) | 128.97 (49.44 ~ 208.50) | 0.002 |  |
| BMI Category |  |  |  | 0.059 |
| Normal | 602 (64.80) | 121.74 (81.25 ~ 162.22) | <.001 |  |
| Underweight | 73 (7.86) | -84.31 (-202.31 ~ 33.69) | 0.166 |  |
| Overweight and Obese | 254 (27.34) | 125.22 (68.06 ~ 182.37) | <.001 |  |
| GWG |  |  |  | 0.656 |
| Appropriate weight gain | 482 (51.88) | 148.03 (102.27 ~ 193.78) | <.001 |  |
| Insufficient weight gain | 157 (16.90) | 91.89 (5.78 ~ 178.01) | 0.038 |  |
| Excessive weight gain | 290 (31.22) | 110.30 (50.98 ~ 169.63) | <.001 |  |
| Pregnancy Period |  |  |  | 0.754 |
| Second trimester (14-28 weeks) | 676 (72.77) | 119.92 (80.18 ~ 159.65) | <.001 |  |
| Third trimester (≥28 weeks) | 253 (27.23) | 151.70 (90.61 ~ 212.78) | <.001 |  |
| CI: Confidence Interval | | | | |

**eTable 15**. Subgroup analyses of the association between percent protein and birth weight

| Variables | n (%) | β (95%CI) | P | P for interaction |
| --- | --- | --- | --- | --- |
| All patients | 929 (100.00) | 7.28 (-27.92 ~ 42.48) | 0.685 |  |
| Gravidity |  |  |  | 0.525 |
| 1 | 323 (34.77) | -37.37 (-102.17 ~ 27.43) | 0.259 |  |
| 2 | 302 (32.51) | 45.22 (-13.23 ~ 103.66) | 0.130 |  |
| ≥3 | 304 (32.72) | 5.20 (-53.84 ~ 64.24) | 0.863 |  |
| Parity |  |  |  | 0.917 |
| 0 | 453 (48.76) | -17.25 (-71.63 ~ 37.14) | 0.535 |  |
| 1 | 365 (39.29) | 27.79 (-24.94 ~ 80.52) | 0.302 |  |
| ≥2 | 111 (11.95) | 14.97 (-74.98 ~ 104.91) | 0.745 |  |
| BMI Category |  |  |  | 0.259 |
| Normal | 602 (64.80) | 13.38 (-26.85 ~ 53.62) | 0.515 |  |
| Underweight | 73 (7.86) | -76.85 (-154.32 ~ 0.61) | 0.056 |  |
| Overweight and Obese | 254 (27.34) | 4.93 (-51.02 ~ 60.87) | 0.863 |  |
| GWG |  |  |  | 0.454 |
| Appropriate weight gain | 482 (51.88) | 16.13 (-31.81 ~ 64.06) | 0.510 |  |
| Insufficient weight gain | 157 (16.90) | 26.92 (-56.72 ~ 110.56) | 0.529 |  |
| Excessive weight gain | 290 (31.22) | -45.13 (-110.20 ~ 19.93) | 0.175 |  |
| Pregnancy Period |  |  |  | 0.643 |
| Second trimester (14-28 weeks) | 676 (72.77) | 3.25 (-39.40 ~ 45.89) | 0.881 |  |
| Third trimester (≥28 weeks) | 253 (27.23) | 14.30 (-49.44 ~ 78.04) | 0.660 |  |
| CI: Confidence Interval | | | | |

**eTable 16**. Subgroup analyses of the association between minerals and birth weight

| Variables | n (%) | β (95%CI) | P | P for interaction |
| --- | --- | --- | --- | --- |
| All patients | 929 (100.00) | 351.20 (268.82 ~ 433.59) | <.001 |  |
| Gravidity |  |  |  | 0.655 |
| 1 | 323 (34.77) | 413.23 (272.04 ~ 554.43) | <.001 |  |
| 2 | 302 (32.51) | 276.15 (121.06 ~ 431.25) | <.001 |  |
| ≥3 | 304 (32.72) | 362.40 (229.37 ~ 495.43) | <.001 |  |
| Parity |  |  |  | 0.866 |
| 0 | 453 (48.76) | 392.81 (269.55 ~ 516.07) | <.001 |  |
| 1 | 365 (39.29) | 319.78 (189.59 ~ 449.96) | <.001 |  |
| ≥2 | 111 (11.95) | 360.39 (151.30 ~ 569.49) | 0.001 |  |
| BMI Category |  |  |  | 0.168 |
| Normal | 602 (64.80) | 345.95 (241.21 ~ 450.70) | <.001 |  |
| Underweight | 73 (7.86) | -38.11 (-310.34 ~ 234.13) | 0.785 |  |
| Overweight and Obese | 254 (27.34) | 361.72 (214.62 ~ 508.82) | <.001 |  |
| GWG |  |  |  | 0.860 |
| Appropriate weight gain | 482 (51.88) | 384.37 (270.55 ~ 498.19) | <.001 |  |
| Insufficient weight gain | 157 (16.90) | 281.70 (46.38 ~ 517.03) | 0.020 |  |
| Excessive weight gain | 290 (31.22) | 341.88 (198.48 ~ 485.28) | <.001 |  |
| Pregnancy Period |  |  |  | 0.788 |
| Second trimester (14-28 weeks) | 676 (72.77) | 341.97 (243.35 ~ 440.58) | <.001 |  |
| Third trimester (≥28 weeks) | 253 (27.23) | 397.40 (242.25 ~ 552.56) | <.001 |  |
| CI: Confidence Interval | | | | |

**eTable 17**.Subgroup analyses of the association between percent minerals and birth weight

| Variables | n (%) | β (95%CI) | *P* | P for interaction |
| --- | --- | --- | --- | --- |
| All patients | 929 (100.00) | 146.77 (47.09 ~ 246.44) | 0.004 |  |
| Gravidity |  |  |  | 0.072 |
| 1 | 323 (34.77) | 121.33 (-75.09 ~ 317.75) | 0.227 |  |
| 2 | 302 (32.51) | 147.16 (-22.57 ~ 316.88) | 0.090 |  |
| ≥3 | 304 (32.72) | 131.97 (-24.78 ~ 288.71) | 0.100 |  |
| Parity |  |  |  | 0.205 |
| 0 | 453 (48.76) | 180.03 (16.06 ~ 344.00) | 0.032 |  |
| 1 | 365 (39.29) | 115.89 (-26.94 ~ 258.73) | 0.113 |  |
| ≥2 | 111 (11.95) | 93.88 (-155.84 ~ 343.59) | 0.463 |  |
| BMI Category |  |  |  | 0.858 |
| Normal | 602 (64.80) | 101.66 (-5.51 ~ 208.83) | 0.064 |  |
| Underweight | 73 (7.86) | -48.02 (-278.82 ~ 182.77) | 0.685 |  |
| Overweight and Obese | 254 (27.34) | 73.95 (-68.34 ~ 216.25) | 0.309 |  |
| GWG |  |  |  | 0.428 |
| Appropriate weight gain | 482 (51.88) | 157.81 (20.07 ~ 295.54) | 0.025 |  |
| Insufficient weight gain | 157 (16.90) | 132.76 (-108.90 ~ 374.43) | 0.283 |  |
| Excessive weight gain | 290 (31.22) | 76.60 (-99.28 ~ 252.47) | 0.394 |  |
| Pregnancy Period |  |  |  | 0.962 |
| Second trimester (14-28 weeks) | 676 (72.77) | 165.79 (43.53 ~ 288.06) | 0.008 |  |
| Third trimester (≥28 weeks) | 253 (27.23) | 99.66 (-77.83 ~ 277.15) | 0.272 |  |
| CI: Confidence Interval | | | | |

**eFigure.** Dose-Response Association of Maternal Body Composition with Offspring Birth Weight.


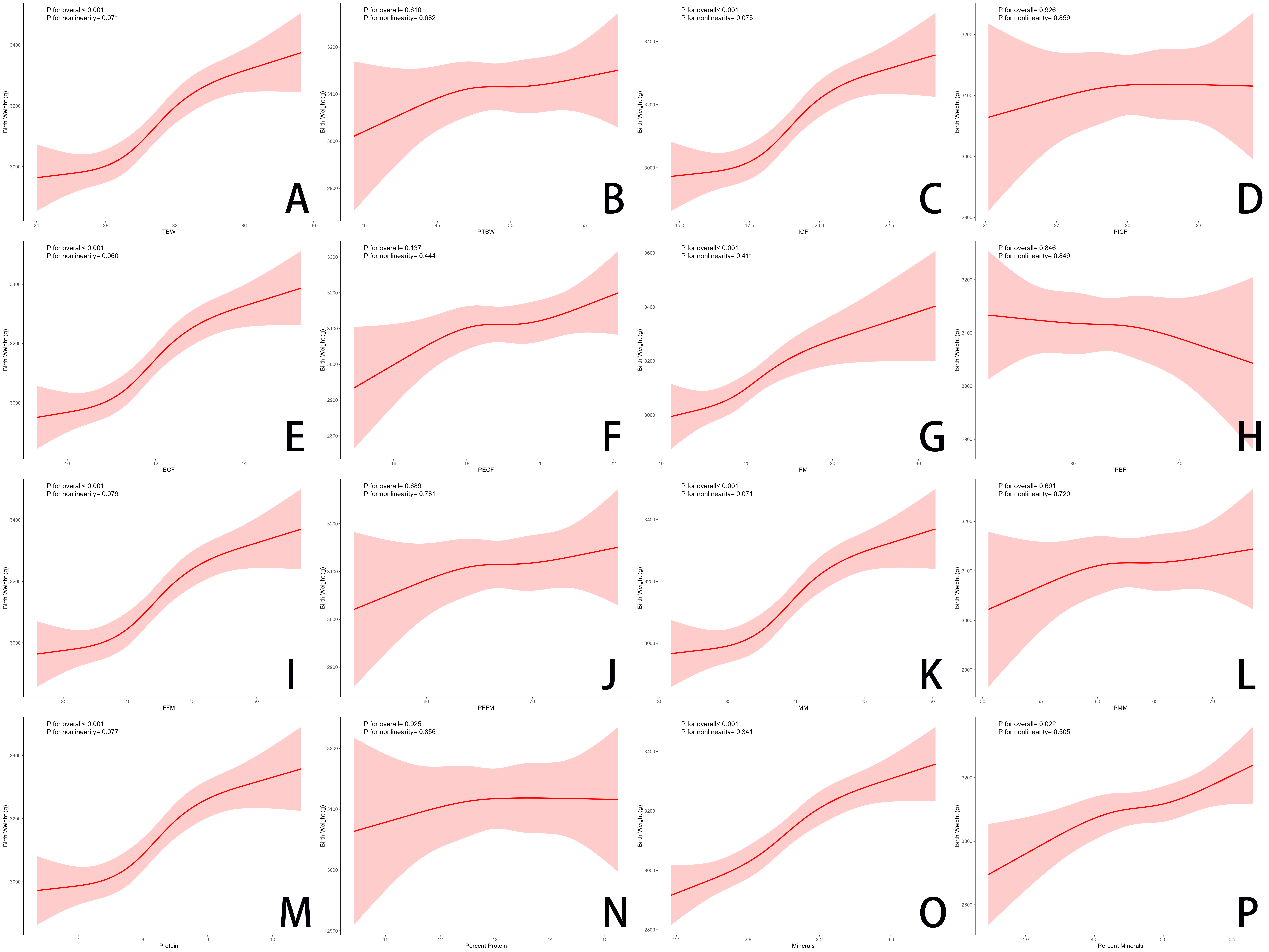


**(A)** Total body water (TBW) (P for overall <0.001, P for nonlinearity =0.071); **(B)** Percent total body water (PTBW) (P for overall =0.610, P for nonlinearity =0.682); **(C)** Intracellular fluid (ICF) (P for overall <0.001, P for nonlinearity =0.075); **(D)** Percent intracellular fluid (PICF) (P for overall =0.926, P for nonlinearity =0.859); **(E)** Extracellular fluid (ECF) (P for overall <0.001, P for nonlinearity =0.060); **(F)** Percent extracellular fluid (PECF) (P for overall =0.317, P for nonlinearity =0.444); **(G)** Fat mass (FM) (P for overall <0.001, P for nonlinearity =0.411); **(H)** Percent body fat (PBF) (P for overall =0.846, P for nonlinearity =0.849); **(I)** Fat-free mass (FFM) (P for overall <0.001, P for nonlinearity =0.079); **(J)** Percent fat-free mass (PFFM) (P for overall =0.689, P for nonlinearity =0.781); **(K)** Muscle mass (MM) (P for overall <0.001, P for nonlinearity =0.071); **(L)** Percent muscle mass (PMM) (P for overall =0.691, P for nonlinearity =0.720); **(M)** Protein (P for overall <0.001, P for nonlinearity =0.077); **(N)** Percent protein (P for overall =0.925, P for nonlinearity =0.856); **(O)** Minerals (P for overall <0.001, P for nonlinearity =0.341); **(P)** Percent minerals (P for overall =0.022, P for nonlinearity =0.505). Curves depict model-adjusted predicted birth weight (solid lines) with 95% confidence intervals (shaded areas), modeled using restricted cubic splines. All predictions are standardized to maternal age, pre-pregnant BMI, GAD, GWG, gravidity, parity and pregnancy period when body composition was done.
